# Supplementary material for: Functional Genetic Diversity among Mycobacterium tuberculosis Complex Clinical Isolates: Delineation of Conserved Core and Lineage-Specific Transcriptomes during Intracellular Survival
Source: PLoS Pathog. 2010 Jul 8;6(7):e1000988. doi: 10.1371/journal.ppat.1000988 (PMC2900310; doi:10.1371/journal.ppat.1000988)
Supplement: Table S2 — Clade specific gene expression in vitro, (63 genes, Clade 2>Clade 1). This list was based on one-way ANOVA analysis of in vitro transcriptome data from log phase bacteria (using Benjamini and Hochberg False Discovery Rate p<0.01). The values indicate expression ratios relative to the CDC1551 reference strain. (0.04 MB XLS) [file ppat.1000988.s012.xls]

## Sheet: Table S2
Table S2
Clade-specific gene expression in vitro - Clade 2 > Clade 1 (63 genes)
One-way ANOVA (using Benjamini and Hochberg False Discovery Rate p<0.01) of in vitro transcriptome data from log phase bacteria identified 156 genes with significant differences in basal expression levels between clade 1 and clade 2 strains.
Strain ID	9679/00	2336/02	4130/02	9532/03	2169/99	2191/99	2333/99	12594/02	1500/03	1934/03	1797/03	4850/03	947/01	10514/01	10517/01	5468/02
Genotype	H37Rv	Haarlem	Haarlem	Haarlem	Uganda	Uganda	Uganda	Beijing	Beijing	Beijing	EAI	EAI	EAI	Afri 2	Afri 2	Afri 2
acca2	0.914169	0.802614	0.980989	0.944609	0.80247	0.996012	0.914795	1.12452	1.02443	1.10823	1.19157	1.23315	1.63403	1.45804	1.35859	1.1683
asps	0.933609	0.889542	0.936054	0.950974	0.957665	1.06802	0.835574	0.903709	0.940363	0.949155	1.04803	1.04316	1.14409	1.10796	1.0977	1.11046
bpoa	0.960661	1.16203	1.26601	1.11756	1.30627	1.19297	1.85918	1.27788	1.24306	1.21633	2.05326	2.44376	2.1536	1.6651	2.03673	1.70063
desa1	1.05299	0.796768	0.807281	0.937119	0.796479	0.918345	0.8349	0.965345	0.913383	1.01345	1.15833	1.04657	1.26204	1.03178	1.05314	1.04904
galt	1.11236	1.03729	1.05594	0.970866	1.17177	0.987786	1.19944	0.962709	1.11729	0.932437	1.60701	1.71409	1.58445	1.57818	1.85853	1.81782
glbn	0.974622	1.10022	0.963693	0.903864	1.32406	1.11965	1.1765	1.08369	1.02801	0.99774	2.06818	1.0234	1.50007	1.8845	1.57345	1.79332
glya	1.11417	1.09661	1.04445	1.05271	1.1517	1.02296	1.17613	1.01046	1.18906	1.08056	1.336	1.21772	1.25718	1.28615	1.35387	1.26998
ilvb	1.02411	0.958967	1.03105	1.00008	1.16035	0.890744	0.864848	0.955577	0.991957	0.98084	1.09718	1.07386	1.05951	1.14612	1.15541	1.2968
lpqq	0.745894	0.776449	0.78946	0.770229	0.677174	0.820808	0.795034	0.690285	0.826442	0.799297	0.727621	0.805328	0.95609	1.40212	0.989584	1.58346
lpqs	0.765099	0.437436	0.547205	0.672522	0.535231	0.572281	0.459086	0.784008	0.755714	0.750267	1.00927	0.718034	0.891664	1.01885	0.969173	1.0158
lprn	0.815391	0.871514	0.919617	0.906361	0.779637	0.894871	0.867494	0.835091	0.848607	0.926315	0.9565	1.13907	1.02626	1.1039	1.07514	1.12582
lpro	0.739849	0.818894	0.827437	0.862903	0.792715	0.86644	0.785305	0.747666	0.777549	0.857008	0.880651	0.889912	1.55673	1.13634	1.32598	1.13043
pepr	0.961841	0.899339	1.05098	1.00337	0.915415	0.937859	1.0152	0.98271	1.05797	0.958383	1.05509	1.04967	1.16408	1.07873	1.19249	1.13614
pfka	0.970732	0.903756	0.942269	0.892463	0.98777	1.01974	0.866476	0.890598	0.926691	0.916157	1.04569	1.03828	0.927895	1.03106	1.12379	1.10225
pknh	1.13127	1.25859	1.25191	1.07567	1.00506	1.24085	1.08779	1.03491	1.09635	1.10758	1.30675	1.38699	1.37561	1.29621	1.31259	1.21834
pks5	0.788325	0.89564	1.01461	1.07367	0.86549	0.929306	0.682658	0.935704	0.98289	0.956268	1.15525	0.967112	1.1646	1.46021	1.25746	1.64283
plsb1	0.950732	1.19863	1.1505	1.04166	1.0538	1.1035	1.20684	0.914423	0.972901	0.980308	1.59821	0.989314	1.5935	1.56138	1.70493	1.93481
recg	1.00993	0.781579	0.86116	0.88191	0.999249	0.849587	1.01551	1.38524	1.38057	1.42319	1.44395	1.28039	1.6527	1.45141	1.67697	1.4816
MT0291.2	0.772206	0.868107	0.77742	0.885015	0.779584	0.694318	0.737776	0.641786	0.619044	0.697791	0.877877	0.809717	0.843931	1.46002	0.97386	1.46673
MT0856.1	0.734604	0.727225	0.654243	0.713829	0.833959	0.718645	0.706658	0.849308	0.8204	0.956504	2.75204	4.14934	1.01127	0.768961	0.78196	0.754544
MT2367	0.906009	0.802848	0.860923	0.878102	0.914462	0.876095	0.907358	0.912894	0.953079	0.851763	1.12466	1.00704	1.12111	1.22962	1.13804	1.17494
MT2988.1	1.07026	1.32772	0.856588	0.935839	1.40012	0.885575	1.37619	0.927054	0.859404	1.36861	1.56691	1.61692	1.49037	1.31597	1.32834	1.44351
MT3223	0.67538	0.456753	0.59881	0.661235	0.442471	0.683926	0.276865	0.454082	0.551876	0.596819	1.41256	0.967496	1.26088	0.58091	0.890856	0.658737
MT3847	0.995543	0.874034	0.960136	1.06817	0.967385	0.700992	0.697821	0.830768	0.763436	0.829685	1.20764	1.67131	1.50289	0.943995	1.14361	0.923216
Rv0007	1.10282	0.878089	0.946501	0.94245	0.882826	1.05317	1.06074	0.908303	0.923553	0.938163	0.908837	0.927464	1.23591	1.22243	1.24483	1.70005
Rv0027	0.966282	0.857977	0.7538	1.00468	1.05427	1.06639	1.1122	0.943298	0.924708	0.852804	1.03525	1.20495	1.15397	1.2675	1.08621	1.33203
Rv0046c	0.792839	0.559177	0.696372	0.742025	0.733741	0.7194	0.726803	0.648769	0.736489	0.649929	1.02525	0.713868	0.967827	0.742066	0.995514	0.896895
Rv0060	0.805926	1.02367	0.830022	0.887836	0.802109	0.94659	0.739981	0.820658	0.813625	0.835832	1.11478	1.06387	1.26267	0.989263	1.06859	0.929685
Rv0159c	0.865731	0.787797	0.760573	0.813221	0.655497	0.788344	0.674969	0.711935	0.806008	0.845347	0.897403	0.755321	0.95068	0.902459	1.01362	1.04666
Rv0216	0.972465	0.944338	1.06361	0.987765	0.878793	0.896401	0.859742	0.998099	0.988017	0.966669	1.05808	1.10292	0.928119	1.39953	1.21748	1.73923
Rv0557	0.998445	0.842034	0.834349	0.860434	1.12893	0.833118	1.09815	0.852576	0.765128	0.760831	2.48235	2.55223	2.46329	1.36944	1.61975	1.24675
Rv0742	1.1031	1.1057	1.21138	1.1489	1.14099	1.04949	1.15439	1.12799	1.13224	1.21396	1.17876	1.25181	1.32631	1.39602	1.31219	1.3251
Rv0823c	1.15772	0.723862	0.800732	0.944509	0.923725	0.978825	0.919485	1.03116	0.903861	0.963083	1.27131	1.21777	1.14141	1.06377	1.13297	1.08123
Rv1214c	0.979942	0.770739	0.906058	0.92256	1.05948	0.97051	0.896599	0.880633	0.886485	0.880297	1.00802	0.994456	1.02094	1.27767	1.12283	1.23213
Rv1382	1.01612	1.17466	1.24091	1.13946	0.938535	1.21785	1.25774	1.0658	1.18672	1.1181	1.33582	1.28676	1.33107	1.34263	1.37902	1.30986
Rv1443c	0.800081	0.707482	0.682379	0.787744	0.826385	0.750642	0.681637	0.71961	0.765597	0.77878	0.881961	0.876481	0.875573	0.871776	0.798334	0.876849
Rv1494	0.746177	0.732624	0.789641	0.750564	0.751171	0.925302	0.769742	0.763505	0.771356	0.801074	0.784256	0.779509	0.931001	1.04124	0.917886	1.0595
Rv1503c	0.932803	1.04175	0.925186	1.04781	1.00189	0.901395	1.10914	0.843424	0.807067	0.927994	1.37961	1.86803	1.40898	1.48594	1.55638	1.56991
Rv1504c	1.02136	0.875467	0.901764	1.05771	0.930766	0.870405	0.924002	0.958616	0.790112	0.810481	1.33498	1.71342	1.1201	1.2702	1.19155	1.38232
Rv1505c	1.20195	1.04782	1.28887	1.13166	1.36456	1.0332	1.70185	0.850278	0.883829	0.844602	1.91041	2.50325	1.98482	2.20345	1.89627	2.42038
Rv1506c	1.08898	0.967614	1.06277	0.975526	1.0718	0.952208	1.14322	0.794065	0.784444	0.797015	1.14018	1.31562	1.26447	1.1752	1.14684	1.16696
Rv1718	1.02027	1.06152	1.0884	1.05999	0.967997	0.972207	1.08672	1.08945	1.12148	0.979137	1.13117	1.12064	1.19007	1.11569	1.33221	1.22852
Rv1895	1.10993	1.1064	0.951812	1.03965	0.937458	0.981401	1.06109	1.09172	1.07253	1.0815	1.59086	1.5818	1.34004	1.07154	1.25273	1.08128
Rv2573	1.15132	1.08724	1.09982	1.07622	1.09994	1.13722	1.20667	0.980369	1.06587	1.09712	1.27581	1.2499	1.49783	1.35951	1.33307	1.36254
Rv2765	1.20505	1.26925	1.19279	1.10263	1.44235	1.26289	1.52314	1.14511	1.1908	1.21668	2.91637	2.99661	2.64445	2.02014	2.53049	2.06607
Rv2974c	1.12748	0.933461	1.15588	1.12042	1.11635	1.15377	1.30487	1.51969	1.49935	1.54007	1.49096	1.56294	1.43844	1.59336	1.77157	1.86883
Rv3008	0.756482	0.732824	0.635311	0.728023	0.758346	0.794359	0.635953	0.650784	0.607009	0.698417	0.958353	0.837167	1.05586	0.73154	0.880599	0.771185
Rv3167c	0.972052	0.693937	0.675868	0.784892	0.690018	0.769751	0.749953	0.848943	0.942822	0.852021	1.33852	1.11708	1.22316	0.89638	1.0077	0.865516
Rv3367	0.875237	0.99682	0.977316	0.918618	0.887172	0.752448	0.794591	1.10232	1.09469	1.08994	1.2119	1.12987	1.20977	1.46062	1.20078	1.39474
Rv3377c	1.12887	1.23952	1.28489	1.19417	1.32235	1.17048	1.391	1.11738	1.13685	1.03568	1.39627	1.51278	1.3842	1.48143	1.43582	1.54925
Rv3378c	0.961881	1.06748	1.08963	1.00041	1.0191	1.03742	0.999292	0.802976	0.820175	0.865229	1.50675	1.43323	1.50624	1.51132	1.44209	1.654
Rv3379c	0.74881	1.10713	0.794299	0.796552	0.849072	0.855558	0.826807	0.76168	0.904156	0.745422	1.14455	1.09113	1.25298	1.10747	1.16774	1.20003
Rv3492c	0.995147	1.43259	1.17535	1.17478	0.877208	1.14604	0.896388	1.20202	1.11639	1.0928	1.35722	1.70182	1.3937	1.41473	1.29474	1.47795
Rv3493c	1.19065	1.47999	1.43571	1.23193	1.06044	1.19176	1.22322	1.26991	1.24383	1.20215	1.64886	2.11728	2.15576	1.71963	1.62777	1.75669
Rv3494c	1.13227	1.4778	1.45232	1.27008	1.09219	1.3592	1.44323	1.30047	1.31366	1.35662	1.48225	2.00076	1.6621	1.60053	1.48115	1.62677
Rv3496c	0.967607	1.19425	1.10428	1.10883	0.850793	1.08026	0.868808	1.02431	1.05919	1.11015	1.27151	1.6656	1.30027	1.18108	1.32921	1.2484
Rv3497c	1.17396	1.35846	1.60204	1.23757	1.10319	1.35459	1.4283	1.1714	1.28024	1.27212	2.00376	1.95363	1.80583	2.01393	1.60446	2.11957
Rv3498c	1.12227	1.28033	1.27257	1.18404	1.0817	1.22139	1.22172	1.14194	1.12602	1.15273	1.45785	1.78995	1.46453	1.48726	1.44194	1.40961
Rv3500c	0.984118	1.21517	1.19704	1.09879	0.948248	1.1027	0.890104	1.17301	1.06411	1.10646	1.48432	1.80538	1.25924	1.18672	1.41603	1.31124
Rv3651	0.738312	0.697254	0.618824	0.676355	0.784481	0.844861	0.5806	0.627151	0.669296	0.70181	1.30401	1.08473	0.962548	0.783208	0.907943	0.806627
Rv3653	1.18504	1.00856	1.12765	1.05069	1.23887	1.09871	1.20861	1.07255	1.10982	1.01835	2.44598	2.68973	2.45298	1.80547	2.09265	1.76915
Rv3741c	1.4193	1.09079	1.42051	1.18141	1.26513	0.808088	1.04955	0.966833	0.903524	0.821041	1.64025	2.44169	2.1916	1.1487	1.65853	1.10931
Rv3742c	1.21504	1.00337	1.1398	1.12329	1.04202	0.890368	0.968498	0.983043	0.940785	0.885744	1.50061	2.09875	1.62283	1.04327	1.35151	1.07755
